# Supplementary material
Source: PubMed Central journal article supplement (PMC5490983)
Supplement: NIHMS872195-supplement-Supplemental_PDF.pdf [file NIHMS872195-supplement-Supplemental_PDF.pdf]

## SUPPLEMENTAL MATERIAL

### Supplementary Methods

In order to maintain the case-control (matched) study design and to avoid loss of sample size, we conducted subgroup analysis by adding appropriate interaction terms to the models. Subgroup-specific linear regression parameters and odds ratios were calculated using combinations of main effect and interaction terms. Inclusion of interaction terms in conditional logistic regression models allowed us to calculate subgroup-specific odds ratios. Because cases and controls were not matched on treatment allocation to rosuvastatin versus placebo, the main effect for treatment along with interaction term was included. For example, in order to calculate the effect of the efflux capacity among participants on-statin, we ran the following regression model:

$$\text{Logit}(p) = \beta_0 + \beta_1(\text{efflux}) + \beta_2(\text{trt01}) + \beta_3(\text{efflux} * \text{trt01}), \text{ where efflux is efflux capacity and trt01 is a dichotomous treatment variable.}$$

Then among treated participants effect of efflux is calculated as:  $(\beta_1 + \beta_3)\text{efflux}$ , while among non-treated participants effect of efflux is calculated as:  $(\beta_1)\text{efflux}$ .

Odds ratios are then  $OR_{\text{efflux}|\text{trt}=1} = \exp(\beta_1 + \beta_3)$  and  $OR_{\text{efflux}|\text{trt}=0} = \exp(\beta_1)$

The standard error of  $\beta_1 + \beta_3$  is computed from the variance-covariance matrix of the estimated regression coefficients as follows:

$$\begin{aligned} se(\beta_1 + \beta_3) &= \sqrt{\text{var}(\beta_1) + \text{var}(\beta_3) + 2 \cdot \text{cov}(\beta_1 \beta_3)} \\ &= \sqrt{[1 \ 1] \times \begin{bmatrix} \text{var}(\beta_1) & \text{cov}(\beta_1 \beta_3) \\ \text{cov}(\beta_3 \beta_1) & \text{var}(\beta_3) \end{bmatrix} \times \begin{bmatrix} 1 \\ 1 \end{bmatrix}} \end{aligned}$$

The confidence interval for  $OR_{\text{efflux}|\text{trt}=1}$  was calculated based on this standard error estimate.

**Supplementary Table 1:** Number of each component of the composite endpoint among cases.

|                                                     | <b>JUPITER Trial<br/>Primary Endpoint</b> | <b>Primary Endpoint +<br/>All-Cause Mortality</b> | <b>Sensitivity Analysis<br/>MI, Stroke, CVD Death</b> |
|-----------------------------------------------------|-------------------------------------------|---------------------------------------------------|-------------------------------------------------------|
| N Current Study / N in<br>Overall JUPITER Trial (%) | 314/393<br>(80%)                          | 525/736<br>(71%)                                  | 182/240<br>(76%)                                      |
| Myocardial Infarction                               | 87                                        | 87                                                | 87                                                    |
| Stroke                                              | 72                                        | 72                                                | 72                                                    |
| Unstable Angina<br>Hospitalization                  | 34                                        | 34                                                |                                                       |
| Arterial Revascularization                          | 180                                       | 180                                               |                                                       |
| Cardiovascular Death                                | 60                                        | 60                                                | 55                                                    |
| Death from Any Cause                                |                                           | 271                                               |                                                       |

Due the possibility of multiple events in a given individual, the sum of composite endpoints may exceed the total number of cases. MI – myocardial infarction. CVD – cardiovascular disease.

**Supplementary Table 2.** Spearman Correlation Coefficients of Baseline Cholesterol Efflux Capacity with Clinical Variables and Biomarkers.

|                           | <b>N</b> | <b>Correlation Coefficient</b> | <b>P-Value</b> |
|---------------------------|----------|--------------------------------|----------------|
| Age                       | 1050     | 0.09                           | 0.002          |
| BMI                       | 1043     | -0.1                           | 0.001          |
| Systolic Blood Pressure   | 1048     | 0.06                           | 0.051          |
| hsCRP (log)               | 1050     | -0.09                          | 0.003          |
| Phospholipase A2 Activity | 798      | -0.21                          | < 0.0001       |
| Non-HDL Cholesterol       | 1050     | 0.19                           | < 0.0001       |
| LDL Cholesterol           | 1050     | 0.15                           | < 0.0001       |
| HDL Cholesterol           | 1050     | 0.39                           | < 0.0001       |
| Triglycerides (log)       | 1050     | 0.13                           | < 0.0001       |
| Apolipoprotein B          | 1046     | 0.18                           | < 0.0001       |
| Apolipoprotein A-I        | 1046     | 0.48                           | < 0.0001       |
| HDL Particle Number       | 996      | 0.39                           | < 0.0001       |
| LDL Particle Number       | 996      | 0.10                           | 0.002          |
| Glucose                   | 1049     | -0.01                          | 0.67           |
| Glycated hemoglobin       | 1040     | -0.02                          | 0.44           |

**Supplementary Table 3.** Association between Baseline Cholesterol Efflux Capacity and Incident Cardiovascular Events According to Clinical Subgroups.

|                     | N   | OR/SD Increment | 95% Confidence Interval | P-Value | P-Value for Interaction |
|---------------------|-----|-----------------|-------------------------|---------|-------------------------|
| Sex                 |     |                 |                         |         |                         |
| Male                | 456 | 0.96            | 0.75 - 1.21             | 0.70    | 0.23                    |
| Female              | 172 | 0.71            | 0.47 - 1.09             | 0.12    |                         |
| Treatment Group     |     |                 |                         |         |                         |
| Placebo             | 379 | 0.88            | 0.68 - 1.14             | 0.34    | 0.89                    |
| Rosuvastatin        | 249 | 0.9             | 0.68 - 1.21             | 0.49    |                         |
| Race                |     |                 |                         |         |                         |
| White               | 564 | 0.86            | 0.7 - 1.07              | 0.18    | 0.39                    |
| Non-white           | 64  | 1.08            | 0.64 - 1.83             | 0.76    |                         |
| Current Smoker      |     |                 |                         |         |                         |
| No                  | 532 | 0.91            | 0.73 - 1.13             | 0.4     | 0.57                    |
| Yes                 | 96  | 0.79            | 0.5 - 1.25              | 0.32    |                         |
| FH of Premature CHD |     |                 |                         |         |                         |
| No                  | 534 | 0.86            | 0.69 - 1.09             | 0.22    | 0.54                    |
| Yes                 | 94  | 1.01            | 0.64 - 1.59             | 0.97    |                         |
| Metabolic Syndrome  |     |                 |                         |         |                         |
| No                  | 372 | 0.9             | 0.69 - 1.18             | 0.45    | 0.88                    |
| Yes                 | 252 | 0.88            | 0.65 - 1.19             | 0.4     |                         |
| hs-CRP              |     |                 |                         |         |                         |
| < Median            | 311 | 0.92            | 0.69 - 1.23             | 0.57    | 0.76                    |
| ≥ Median            | 317 | 0.87            | 0.67 - 1.13             | 0.3     |                         |
| Non-HDL Cholesterol |     |                 |                         |         |                         |
| < Median            | 313 | 0.89            | 0.68 - 1.16             | 0.38    | 0.98                    |
| ≥ Median            | 315 | 0.89            | 0.67 - 1.19             | 0.44    |                         |
| LDL Cholesterol     |     |                 |                         |         |                         |
| < Median            | 310 | 0.89            | 0.69 - 1.15             | 0.38    | 0.96                    |
| ≥ Median            | 318 | 0.89            | 0.67 - 1.17             | 0.39    |                         |
| Apolipoprotein B    |     |                 |                         |         |                         |
| < Median            | 307 | 0.91            | 0.69 - 1.18             | 0.47    | 0.83                    |
| ≥ Median            | 318 | 0.94            | 0.7 - 1.28              | 0.72    |                         |
| LDL Particle Number |     |                 |                         |         |                         |
| < Median            | 295 | 0.99            | 0.75 - 1.3              | 0.93    | 0.59                    |
| ≥ Median            | 296 | 0.89            | 0.65 - 1.21             | 0.46    |                         |
| HDL Cholesterol     |     |                 |                         |         |                         |
| < Median            | 306 | 0.85            | 0.63 - 1.14             | 0.28    | 0.59                    |
| ≥ Median            | 322 | 0.94            | 0.71 - 1.24             | 0.65    |                         |
| Apolipoprotein A-I  |     |                 |                         |         |                         |
| < Median            | 310 | 0.98            | 0.72 - 1.33             | 0.89    | 0.83                    |

|                     |     |      |             |      |      |
|---------------------|-----|------|-------------|------|------|
| ≥ Median            | 315 | 1.02 | 0.76 - 1.36 | 0.90 |      |
| HDL Particle Number |     |      |             |      |      |
| < Median            | 294 | 1.16 | 0.81 – 1.66 | 0.41 | 0.57 |
| ≥ Median            | 297 | 1.02 | 0.75 – 1.38 | 0.91 |      |

Odds ratios were adjusted for age, race, treatment group, smoking status, systolic blood pressure, body-mass index, fasting glucose, low-density lipoprotein cholesterol level, log-transformed triglyceride level, and family history of premature coronary artery disease. The stratification variable (e.g. smoking status for current smokers versus nonsmokers) was excluded from list of covariate adjustments for each respective analysis. OR – Odds Ratio.

**Supplementary Table 4.** Efficacy of Rosuvastatin Therapy According to Baseline Cholesterol Efflux Capacity.

|                             | N<br>(N Rosuvastatin<br>/ N Placebo ) | Efficacy of<br>Rosuvastatin<br>(OR) | 95%<br>Confidence<br>Interval | P-Value | P-Value<br>for<br>Interaction |
|-----------------------------|---------------------------------------|-------------------------------------|-------------------------------|---------|-------------------------------|
| Cholesterol Efflux Capacity |                                       |                                     |                               |         |                               |
| Tertile 1                   | 210 (74 / 136)                        | 0.60                                | 0.31 - 1.16                   | 0.13    |                               |
| Tertile 2                   | 209 (82 / 127)                        | 0.72                                | 0.40 - 1.30                   | 0.27    | 0.93                          |
| Tertile 3                   | 209 (93 / 116)                        | 0.67                                | 0.30 - 1.23                   | 0.20    |                               |

Odds ratios for rosuvastatin (versus placebo) in predicting the JUPITER trial primary endpoint were adjusted for age, race, treatment group, smoking status, systolic blood pressure, body-mass index, fasting glucose, low-density lipoprotein cholesterol level, log-transformed triglyceride level, and family history of premature coronary artery disease in conditional logistic regression model. Case control pairs were matched on sex, age at baseline and time of the event. OR – Odds Ratio.

**Supplementary Table 5: Spearman Correlations between Change in HDL-related Biomarkers**

|                                      | $\Delta$ HDL Cholesterol   | $\Delta$ Apolipoprotein A-I | $\Delta$ HDL Particle Number | $\Delta$ Cholesterol Efflux Capacity |
|--------------------------------------|----------------------------|-----------------------------|------------------------------|--------------------------------------|
| $\Delta$ HDL Cholesterol             | --                         |                             |                              |                                      |
| $\Delta$ Apolipoprotein A-I          | 0.46<br>P < 0.001<br>N=840 | --                          |                              |                                      |
| $\Delta$ HDL Particle Number         | 0.36<br>P < 0.001<br>N=739 | 0.51<br>P < 0.001<br>N=733  | --                           |                                      |
| $\Delta$ Cholesterol Efflux Capacity | 0.26<br>P < 0.001<br>N=614 | 0.36<br>P < 0.001<br>N=608  | 0.20<br>P < 0.001<br>N=557   | --                                   |

**Supplementary Table 6:** Association between 12-Month Change in HDL-related Biomarkers and Risk of Incident Cardiovascular Events.

|                               | <b>N<br/>(N Cases /<br/>N Controls)</b> | <b>Magnitude of 10%<br/>Change</b> | <b>Odds Ratio per<br/>10% Change<br/>(95%CI), P Value</b> |
|-------------------------------|-----------------------------------------|------------------------------------|-----------------------------------------------------------|
| Δ HDL Cholesterol             | 458<br>(229/229)                        | 5.1 mg/dl                          | 0.91<br>(0.8 - 1.04)<br>P=0.17                            |
| Δ Apolipoprotein A-I          | 452<br>(226/226)                        | 16.1 mg/dl                         | 0.90<br>(0.77 - 1.06)<br>P=0.2                            |
| Δ HDL Particle Number         | 396<br>(198/198)                        | 3.2 μmol/l                         | 0.97<br>(0.84 - 1.12)<br>P=0.64                           |
| Δ Cholesterol Efflux Capacity | 462<br>(231/231)                        | 1.6%                               | 0.96<br>(0.88 - 1.04)<br>P=0.33                           |

Odds ratios for the JUPITER trial primary endpoint were assessed per standard deviation increment change and adjusted for age, race, treatment group, smoking status, systolic blood pressure, body-mass index, fasting glucose, low-density lipoprotein cholesterol level, log-transformed triglyceride level, and family history of premature coronary artery disease



**Supplementary Table 7.** Baseline Characteristics in On-statin Analysis of Cholesterol Efflux Capacity and Incident Cardiovascular Disease

|                                    | Primary Endpoint Controls (N=98) | Primary Endpoint Cases (N=80) | Primary Endpoint + Total Mortality Controls (N=136) | Primary Endpoint + Total Mortality Cases (N=112) |
|------------------------------------|----------------------------------|-------------------------------|-----------------------------------------------------|--------------------------------------------------|
| Age, years                         | 70 (64-74)                       | 70 (65-76)                    | 70 (64-74.2)                                        | 70 (65-76)                                       |
| Female Sex                         | 23 (23%)                         | 20 (25%)                      | 33 (24%)                                            | 31 (28%)                                         |
| White Race                         | 94 (96%)                         | 73 (91%)                      | 128 (94%)                                           | 100 (89%)                                        |
| Body-Mass Index, kg/m <sup>2</sup> | 29 (26-31)                       | 27.8 (25-31)                  | 29.3 (26-32)                                        | 27 (24-31)*                                      |
| Systolic Blood Pressure, mm Hg     | 137 (124-144)                    | 134 (124-145)                 | 136 (126-144)                                       | 132 (125-144)                                    |
| Current smoker                     | 13 (13%)                         | 19 (24%)                      | 19 (14%)                                            | 28 (25%)*                                        |
| FH of Premature CHD <sup>†</sup>   | 14 (14%)                         | 10 (12%)                      | 21 (15%)                                            | 14 (12%)                                         |
| Metabolic syndrome                 | 40 (42%)                         | 32 (41%)                      | 54 (40%)                                            | 40 (36%)                                         |
| On-Statin hsCRP, mg/l              | 4 (3-6)                          | 5 (3-9)*                      | 4 (3-7)                                             | 5 (3-9)*                                         |
| Lp-PLA2 Activity, nmol/min/mL      | 197 (170-224)                    | 192 (163-229)                 | 199 (172-226)                                       | 194 (160-225)                                    |
| Fasting Glucose, mg/dl             | 95 (90-100)                      | 94.5 (90-103)                 | 95 (90-101)                                         | 95 (90-103)                                      |
| On-Statin Lipids, mg/dL            |                                  |                               |                                                     |                                                  |
| LDL Cholesterol                    | 53 (42-67)                       | 61 (44-81)                    | 52 (41-66)                                          | 59 (43-84)*                                      |
| HDL Cholesterol                    | 56 (43-66)                       | 50 (43-60)                    | 54 (49-66)                                          | 50 (43-60)                                       |
| Triglycerides                      | 96 (75-141)                      | 99.5 (73-127)                 | 94 (70-139)                                         | 104 (76-134)                                     |
| Apolipoproteins                    |                                  |                               |                                                     |                                                  |
| Apolipoprotein B, mg/dl            | 65 (58-74)                       | 74 (58-87)*                   | 65 (56-74)                                          | 73.5 (58-88)*                                    |
| Apolipoprotein A-I, mg/dl          | 166 (147-196)                    | 159 (145-182)                 | 165 (144-193)                                       | 159 (143-177)                                    |
| HDL Particle Number, $\mu$ mol/l   | 34 (31-39)                       | 31 (28-35)*                   | 34 (31-39)                                          | 30 (27-35)*                                      |
| Cholesterol Efflux Capacity, %     | 14 (12-17)                       | 13 (11-16)*                   | 13 (11-17)                                          | 13 (11-16)                                       |

Values represent n(%) or median (25-75%). FH – Family History - CHD – Coronary Heart Disease - hsCRP – high-sensitivity C-Reactive Protein - Lp-PLA2 – lipoprotein-associated phospholipase A<sub>2</sub> - LDL – low-density lipoprotein - HDL – high-density lipoprotein.

\* indicates Chi-square or Wilcoxon rank-sum test p-value < 0.05

<sup>†</sup> Family history of premature coronary disease was defined as diagnosis of the disease in a male first-degree relative before the age of 55 y or in a female first-degree relative before the age of 65 y.

**Supplementary Table 8.** Association between On-Statin Cholesterol Efflux Capacity and Incident Cardiovascular Events According to Clinical Subgroups

|                               | N   | OR/SD Increment | 95% Confidence Interval | P-Value | P-Value for Interaction |
|-------------------------------|-----|-----------------|-------------------------|---------|-------------------------|
| Sex                           |     |                 |                         |         |                         |
| Male                          | 135 | 0.66            | 0.42 - 1.05             | 0.08    | 0.24                    |
| Female                        | 43  | 0.37            | 0.16 - 0.86             | 0.02    |                         |
| Current Smoker                |     |                 |                         |         |                         |
| No                            | 146 | 0.6             | 0.39 - 0.93             | 0.02    | 0.77                    |
| Yes                           | 32  | 0.69            | 0.32 - 1.48             | 0.34    |                         |
| FH of Premature CHD           |     |                 |                         |         |                         |
| No                            | 154 | 0.64            | 0.42 - 0.98             | 0.04    | 0.9                     |
| Yes                           | 24  | 0.6             | 0.23 - 1.56             | 0.3     |                         |
| Metabolic Syndrome            |     |                 |                         |         |                         |
| No                            | 103 | 0.56            | 0.34 - 0.91             | 0.02    | 0.53                    |
| Yes                           | 72  | 0.71            | 0.39 - 1.28             | 0.25    |                         |
| hs-CRP                        |     |                 |                         |         |                         |
| < Median                      | 89  | 0.56            | 0.33 - 0.96             | 0.03    | 0.61                    |
| ≥ Median                      | 89  | 0.67            | 0.4 - 1.12              | 0.13    |                         |
| Non-HDL Cholesterol           |     |                 |                         |         |                         |
| < Median                      | 88  | 0.59            | 0.34 - 1.03             | 0.06    | 0.81                    |
| ≥ Median                      | 90  | 0.55            | 0.32 - 0.93             | 0.02    |                         |
| LDL Cholesterol*              |     |                 |                         |         |                         |
| < Median                      | 155 | 0.56            | 0.37 - 0.85             | 0.01    | 0.92                    |
| ≥ Median                      | 22  | 0.6             | 0.17 - 2.06             | 0.41    |                         |
| HDL Cholesterol               |     |                 |                         |         |                         |
| < Median                      | 88  | 0.53            | 0.28 - 0.98             | 0.04    | 0.53                    |
| ≥ Median                      | 90  | 0.67            | 0.4 - 1.12              | 0.13    |                         |
| Apolipoprotein B <sup>#</sup> |     |                 |                         |         |                         |
| < Median                      | 151 | 0.66            | 0.44 - 0.98             | 0.04    | 0.88                    |
| ≥ Median                      | 24  | 0.6             | 0.19 - 1.88             | 0.38    |                         |
| Apolipoprotein A-I            |     |                 |                         |         |                         |
| < Median                      | 89  | 0.65            | 0.36 - 1.18             | 0.16    | 0.78                    |
| ≥ Median                      | 89  | 0.58            | 0.34 - 1.00             | 0.05    |                         |

|                     |    |      |             |      |      |
|---------------------|----|------|-------------|------|------|
| LDL Particle Number |    |      |             |      |      |
| < Median            | 79 | 0.51 | 0.28 - 0.92 | 0.03 | 0.6  |
| ≥ Median            | 80 | 0.62 | 0.36 - 1.08 | 0.09 |      |
| HDL Particle Number |    |      |             |      |      |
| < Median            | 79 | 0.64 | 0.32 - 1.27 | 0.2  | 0.64 |
| ≥ Median            | 80 | 0.79 | 0.44 - 1.41 | 0.43 |      |

Odds ratios for the JUPITER trial primary endpoint were adjusted for age, race, smoking status, systolic blood pressure, body-mass index, fasting glucose, on-treatment low-density lipoprotein cholesterol levels, on-treatment log-transformed triglyceride levels, and family history of premature coronary artery disease. OR – Odds Ratio.

\* To avoid multicollinearity, threshold was calculated using both cases and controls.

**Supplementary Table 9.** Associations between Baseline HDL-Related Phenotypes and Incident Cardiovascular Events

|                            | <b>Tertile One</b> | <b>Tertile Two</b> | <b>Tertile Three</b> | <b>P-Trend</b> |
|----------------------------|--------------------|--------------------|----------------------|----------------|
| <b>HDL Cholesterol</b>     |                    |                    |                      |                |
| Range, mg/dl               | 23-43              | 44-57              | 58-98                |                |
| N Cases / N Controls       | 121/113            | 113/96             | 76/104               |                |
| Adjusted OR (95%CI)        | Reference          | 1.27 (0.83-1.95)   | 0.9 (0.53-1.50)      | 0.80           |
| P-Value                    | --                 | 0.26               | 0.68                 |                |
| <b>Apolipoprotein A-I</b>  |                    |                    |                      |                |
| Range, mg/dl               | 89-146             | 147-175            | 176-261              |                |
| N Cases / N Controls       | 114/101            | 124/103            | 72/107               |                |
| Adjusted OR (95%CI)        | Reference          | 0.94 (0.61-1.44)   | 0.58 (0.34-1.0)      | 0.06           |
| P-Value                    | --                 | 0.77               | 0.05                 |                |
| <b>HDL Particle Number</b> |                    |                    |                      |                |
| Range, $\mu$ mol/l         | 17-28.6            | 28.7-34.2          | 34.3-53.2            |                |
| N Cases / N Controls       | 110/84             | 104/94             | 89/109               |                |
| Adjusted OR (95%CI)        | Reference          | 0.87 (0.55-1.38)   | 0.59 (0.36-0.97)     | 0.03           |
| P-Value                    | --                 | 0.54               | 0.04                 |                |

Odds ratio adjusted for age, , race, treatment group, smoking status, systolic blood pressure, body-mass index, fasting glucose, low- density lipoprotein cholesterol level, log-transformed triglyceride level, and family history of premature coronary artery disease. OR – Odds Ratio. P-trend – P-value for linear trend across tertiles.

**Supplementary Table 10.** Associations between On-statin HDL-Related Phenotypes and Incident Cardiovascular Events

|                            | <b>Tertile One</b> | <b>Tertile Two</b> | <b>Tertile Three</b> | <b>P-Trend</b> |
|----------------------------|--------------------|--------------------|----------------------|----------------|
| <b>HDL Cholesterol</b>     |                    |                    |                      |                |
| Range, mg/dl               | 22-44              | 45-61              | 62-118               |                |
| N Cases / N Controls       | 114/99             | 87/106             | 47/99                |                |
| Adjusted OR (95%CI)        | Reference          | 0.92 (0.42-2.02)   | 0.37 (0.16-0.86)     | <0.0001        |
| P-Value                    | --                 | 0.84               | 0.02                 |                |
| <b>Apolipoprotein A-I</b>  |                    |                    |                      |                |
| Range, mg/dl               | 97-150             | 151-179            | 180-288              |                |
| N Cases / N Controls       | 106/108            | 85/90              | 52/106               |                |
| Adjusted OR (95%CI)        | Reference          | 1.38 (0.63-3.05)   | 0.74 (0.24-2.26)     | 0.07           |
| P-Value                    | --                 | 0.42               | 0.60                 |                |
| <b>HDL Particle Number</b> |                    |                    |                      |                |
| Range, $\mu\text{mol/l}$   | 20.8-30.3          | 30.4-35.7          | 35.8-53.1            |                |
| N Cases / N Controls       | 108/87             | 68/94              | 44/89                |                |
| Adjusted OR (95%CI)        | Reference          | 0.27 (0.11-0.70)   | 0.17 (0.07-0.44)     | 0.41           |
| P-Value                    | --                 | 0.01               | <0.0001              |                |

Odds ratio adjusted for the JUPITER trial primary endpoint adjusted for age, race, treatment group, smoking status, systolic blood pressure, body-mass index, fasting glucose, on-statin low-density lipoprotein cholesterol level, on-statin log-transformed triglyceride level, and family history of premature coronary artery disease. OR – Odds Ratio. P-trend – P-value for linear trend across tertiles.
